# Supplementary material for: Cognitive Dysfunction: Part and Parcel of the Diabetic Foot
Source: Oxford University Press journal article supplement (doi:10.2337/dc15-2838), 2016-05-13
Supplement: dc152838supplementarydata.pdf [file dc152838supplementarydata.pdf]

SUPPLEMENTARY DATA

**Supplementary Appendix 1.** frequencies of diabetic foot ulcer cases by grade and stage of severity (according to the University of Texas at San Antonio wound classification system)

| Grade    | STAGE    |           |            | Total |
|----------|----------|-----------|------------|-------|
|          | <b>I</b> | <b>II</b> | <b>III</b> |       |
| <b>A</b> | 7        | 8         | 3          | 18    |
| <b>B</b> | 3        | 14        | 7          | 24    |
| <b>C</b> | 1        | 11        | 8          | 20    |
| <b>D</b> | 4        | 30        | 3          | 37    |
| Total    |          |           |            | 99    |
